# Supplementary figures and images for: Prenatal Detection of a FOXF1 Deletion in a Fetus with ACDMPV and Hydronephrosis
Source: MDPI journal article supplement (doi:10.3390/genes14030563), 2023-02-23

A

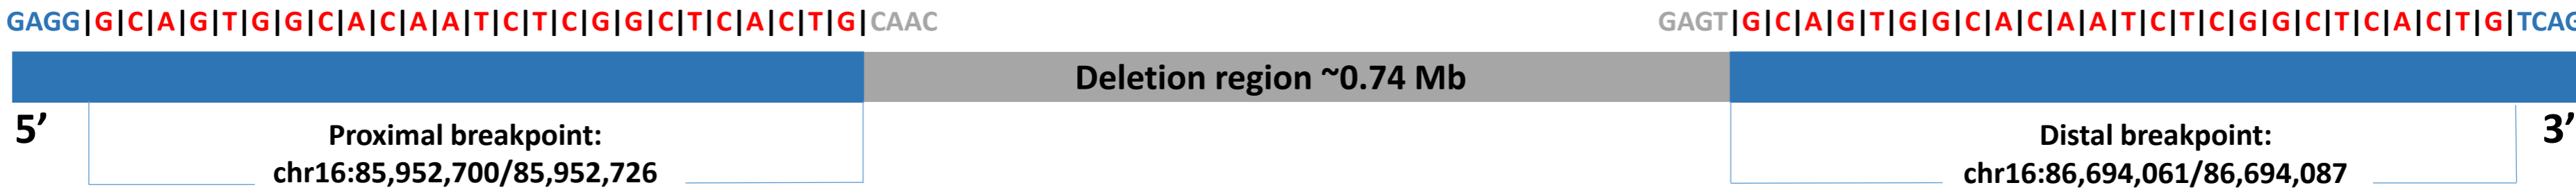

B

Junction

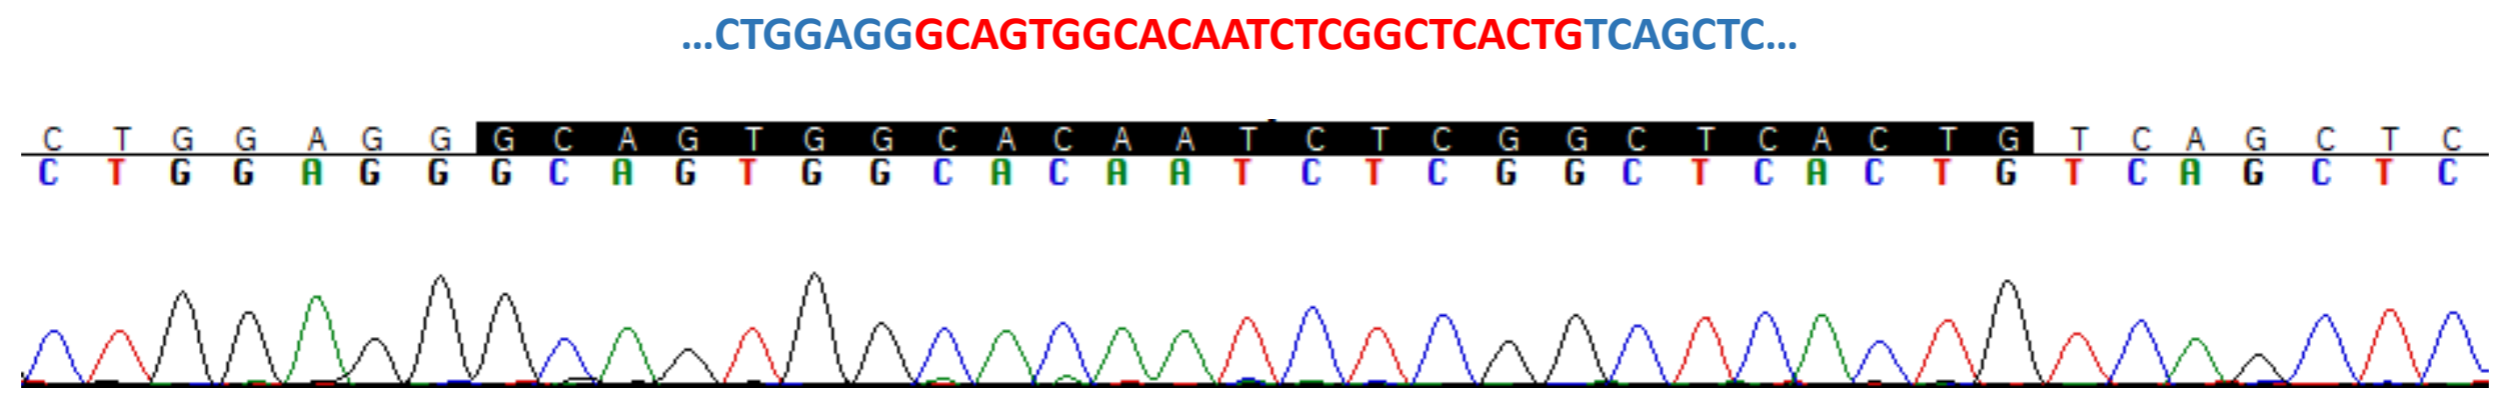

Supplement: s1 [file s1]
